# Supplementary material for: Is Combination Antiviral Therapy Mandatory for Maintenance Therapy in Fully Suppressed Multidrug-Resistant Hepatitis B Patients?
Source: Hindawi journal article supplement (doi:10.1155/2018/6948235), 2018-12-16
Supplement: f1 [file 6948235.f1.pdf]

## 1 Supplementary Materials

2

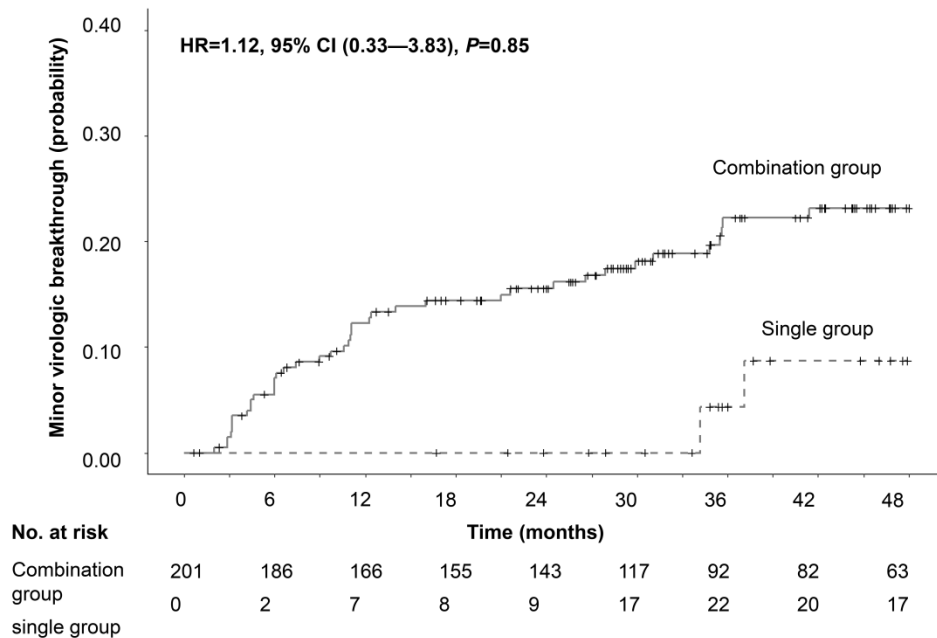

3

4 **Supplementary Figure S1. Extended Kaplan-Meier curves of cumulative incidence of**  
 5 **minor virologic breakthrough, stratified by time-varying TDF monotherapy status.** The  
 6 index date was set as the date of complete virologic suppression. Hazard ratio (HR), 95%  
 7 confidence intervals (CI) and P values were calculated by the time-varying Cox proportional  
 8 hazard model with time-varying covariate. Abbreviations: CI, confidence interval; HR,  
 9 hazard ratio; TDF, tenofovir disoproxil fumarate.

10

**Supplementary Table S1. Patients' characteristics who experienced virologic breakthrough ( $\geq 100$  IU/mL) / minor virologic breakthrough ( $\geq 20$  IU/mL)**

| No. | Group | Age | Sex | HBeAg | HBV DNA titer | ALT | Previous treatment before combination therapy | Months from combination treatment | Months from CVS | Clinical information | outcome | detected mutation         |
|-----|-------|-----|-----|-------|---------------|-----|-----------------------------------------------|-----------------------------------|-----------------|----------------------|---------|---------------------------|
| 3   | Com   | 47  | F   | +     | 650000        | 14  | LAM+ADV                                       | 36.8                              | 31.1            | poor compliance      | CVS     | rtL180M, rtS202G, rtM204V |
| 5   | Com   | 55  | F   | -     | 20            | 30  | ETV                                           | 14.1                              | 10.6            | poor compliance      | CVS     | rtL180M, rtM204V, rtM250V |
| 7   | Com   | 58  | M   | +     | 32            | 20  | LAM+ADV                                       | 44.1                              | 35.5            |                      | CVS     | rtL180M, rtM204V, rtM250L |
| 9   | Com   | 43  | M   | +     | 17000000<br>0 | 17  | ETV                                           | 54.2                              | 41.4            | poor compliance      | CVS     | rtL180M, rtS202G, rtM204V |
| 10  | Com   | 50  | M   | +     | 28            | 27  | ETV+ADV                                       | 12.8                              | 11.1            |                      | CVS     | rtA181V                   |

|    |        |    |   |   |      |     |         |      |      |                    |        |                                                          |
|----|--------|----|---|---|------|-----|---------|------|------|--------------------|--------|----------------------------------------------------------|
| 15 | Com    | 61 | M | + | 1010 | 133 | ETV     | 5.3  | 4.6  |                    | death‡ | rtL180M, rtS202G,<br>rtM204V                             |
| 19 | Com    | 55 | F | + | 53   | 24  | ETV+ADV | 9.9  | 4.4  |                    | CVS    | rtA181T                                                  |
| 26 | Single | 49 | M | + | 27   | 23  | ETV+ADV | 40.1 | 34.2 |                    | CVS    | rtL180M, rtM204V,<br>rtN236T                             |
| 36 | Com    | 54 | M | - | 28   | 17  | LAM+ADV | 17.6 | 4.4  |                    | CVS    | rtA181T                                                  |
| 39 | Com    | 67 | F | + | 22   | 28  | ETV+ADV | 21.9 | 21.0 |                    | CVS    | rtL80I, rtL180M,<br>rtA181V, rtM204I,<br>rtM204V, sG145R |
| 41 | Com    | 68 | M | + | 54   | 23  | ETV+ADV | 31.9 | 3.2  |                    | CVS    | rtL180M, rtM204V                                         |
| 46 | Com    | 40 | M | + | 64   | 81  | ETV+ADV | 38.0 | 6.1  | poor<br>compliance | CVS    | rtL80I, rtM204I                                          |
| 47 | Com    | 57 | M | + | 299  | 28  | ETV     | 6.0  | 6.0  |                    | CVS    | rtL180M, rtM204V,<br>rtT184I, rtS202G                    |

|    |        |    |   |   |     |     |         |      |      |                 |     |                                       |
|----|--------|----|---|---|-----|-----|---------|------|------|-----------------|-----|---------------------------------------|
| 48 | Com    | 61 | F | + | 31  | 29  | ETV+ADV | 7.9  | 3.2  |                 | CVS | rtL180M, rtM204I                      |
| 49 | Single | 33 | M | - | 103 | 62  | ADV     | 37.1 | 37.1 | poor compliance | CVS | rtA181S, rtT184I,<br>rtM204I          |
| 50 | Com    | 53 | M | - | 36  | 40  | LAM+ADV | 25.4 | 9.0  | poor compliance | CVS | rtL180M, rtS202G,<br>rtM204V          |
| 55 | Com    | 50 | M | - | 24  | 51  | LAM+ADV | 27.2 | 24.5 |                 | CVS | rtL180M, rtT184S,<br>rtM204V          |
| 61 | Com    | 49 | M | + | 37  | 44  | LAM+ADV | 29.9 | 29.9 |                 | CVS | rtL180M, rtM204I,<br>rtM204V, rtS202G |
| 70 | Com    | 33 | M | + | 60  | 179 | ETV+ADV | 32.0 | 10.9 | poor compliance | CVS | rtV173L, rtL180M,<br>rtM204V, rtV173L |
| 74 | Com    | 48 | M | + | 21  | 48  | LAM+ADV | 18.4 | 12.3 | poor compliance | CVS | rtA181T                               |
| 79 | Com    | 47 | M | + | 33  | 29  | ETV     | 8.3  | 6.0  |                 | CVS | rtL180M, rtS202G,<br>rtM204V          |

|     |        |    |   |   |      |    |         |      |      |  |     |                                       |
|-----|--------|----|---|---|------|----|---------|------|------|--|-----|---------------------------------------|
| 85  | Com    | 63 | M | + | 30   | 31 | ETV     | 22.1 | 14.0 |  | CVS | rtA181T                               |
| 86  | Com    | 54 | M | - | 23   | 27 | ETV+ADV | 18.4 | 2.9  |  | CVS | rtL180M, rtM204V                      |
| 89  | Com    | 57 | F | + | 46   | 37 | ETV+ADV | 8.5  | 2.9  |  | CVS | rtL180M, rtT184A,<br>rtS202G, rtM204V |
| 91  | Com    | 50 | M | + | 38   | 32 | LAM+ADV | 18.1 | 3.2  |  | CVS | rtL80I, rtV173L,<br>rtL180M, rtM204V  |
| 98  | Com    | 63 | M | + | 1150 | 27 | ETV     | 16.4 | 12.4 |  | CVS | rtM204I                               |
| 105 | Com    | 50 | M | + | 63   | 36 | LdT+ADV | 7.9  | 4.2  |  | CVS | rtA181T, rtM204I                      |
| 106 | Com    | 52 | M | + | 32   | 70 | ETV+ADV | 12.2 | 6.0  |  | CVS | rtL80I, rtL180M,<br>rtM204I           |
| 113 | Single | 63 | F | + | 20   | 22 | LAM+ADV | 59.0 | 57.4 |  | CVS | rtL80V, rtA181T,<br>rtM204I           |
| 138 | Com    | 68 | M | - | 30   | 13 | ETV+ADV | 35.3 | 6.6  |  | CVS | rtV173L, rtL180M,<br>rtM204V          |

|     |     |    |   |   |    |     |         |      |      |  |     |                                       |
|-----|-----|----|---|---|----|-----|---------|------|------|--|-----|---------------------------------------|
| 140 | Com | 44 | M | - | 21 | 27  | ETV+ADV | 22.4 | 3.1  |  | CVS | rtL180M, rtA181T,<br>rtM204V, rtN236T |
| 158 | Com | 56 | M | - | 37 | 98  | LAM+ADV | 17.3 | 16.0 |  | CVS | rtA181V                               |
| 164 | Com | 63 | F | + | 21 | 152 | ETV     | 28.9 | 26.6 |  | CVS | rtA181S, rtT184I,<br>rtM204I          |
| 165 | Com | 53 | M | + | 39 | 25  | ETV     | 31.4 | 27.9 |  | CVS | rtL180M, rtS202G,<br>rtM204V          |
| 166 | Com | 62 | F | + | 50 | 84  | LAM+ADV | 38.4 | 35.7 |  | CVS | rtV173L, rtL180M,<br>rtM204V          |
| 174 | Com | 42 | M | + | 21 | 27  | ETV+ADV | 34.8 | 34.8 |  | CVS | rtL80I, rtL180M,<br>rtA181T, rtM204I  |
| 175 | Com | 29 | M | + | 32 | 48  | ETV+ADV | 14.5 | 7.4  |  | CVS | rtA181T                               |
| 180 | Com | 65 | M | + | 86 | 59  | ETV     | 13.0 | 11.0 |  | CVS | rtL180M, rtT184S,<br>rtM204I          |

|     |     |    |   |   |    |    |         |      |      |  |     |                                      |
|-----|-----|----|---|---|----|----|---------|------|------|--|-----|--------------------------------------|
| 189 | Com | 51 | M | + | 29 | 20 | ADV     | 16.8 | 11.1 |  | CVS | rtA181V, rtN236T                     |
| 192 | Com | 64 | F | + | 25 | 30 | ETV     | 31.7 | 21.6 |  | CVS | rtL80I, rtL180M,<br>rtT184A, rtM204V |
| 193 | Com | 71 | M | + | 22 | 30 | ETV     | 39.1 | 35.6 |  | CVS | rtL180M, rtT184A,<br>rtM204V         |
| 203 | Com | 57 | M | - | 34 | 18 | ETV     | 49.3 | 2.0  |  | CVS | rtL180M, rtS202G,<br>rtM204V         |
| 212 | Com | 52 | F | + | 41 | 20 | ETV+ADV | 15.3 | 9.7  |  | CVS | rtA181V                              |

Grey colored rows represent patients who experienced virologic breakthrough (HBV DNA titer  $\geq 100$  IU/mL) others represent minor virologic breakthrough (HBV DNA above the detection level which is HBV DNA titer  $\geq 20$  IU/mL). If there was clinical evidence of poor compliance in medical record, it was documented at the clinical information column. To detect HBV DNA mutation, PCR and direct sequencing method was applied. ‡ Patient expired due to hepatocellular carcinoma progression and before patient's death, CVS was achieved within the patient. Abbreviations: ADV, adefovir; CVS, complete virological suppression, ETV, entecavir; LAM, lamivudine; LdT, telbivudine.

**Supplementary Table S2. Univariable and multivariable Cox proportional hazard analysis for minor virologic breakthrough (HBV DNA titer  $\geq$  20 IU/mL)**

| Parameter         | Univariable analysis |                 | Multivariable analysis |                 |
|-------------------|----------------------|-----------------|------------------------|-----------------|
|                   | HR (95% CI)          | <i>P</i> -value | aHR (95% CI)           | <i>P</i> -value |
| Treatment         |                      |                 |                        |                 |
| Combination group | 1 [Reference]        |                 | 1 [Reference]          |                 |
| Single group      | 1.12 (0.33–3.83)     | 0.85            | 1.20 (0.35–4.15)       | 0.77            |
| Age (per 1 year)  | 0.99 (0.97–1.03)     | 0.92            |                        |                 |
| Male              | 1.17 (0.59–2.32)     | 0.65            |                        |                 |
| HBeAg             |                      |                 |                        |                 |
| Negative          | 1 [Reference]        |                 | 1 [Reference]          |                 |
| Positive          | 2.92 (1.44–5.93)     | 0.002           | 2.93 (1.44–5.95)       | 0.003           |
| Underlying LC     |                      |                 |                        |                 |
| Absent            | 1 [Reference]        |                 |                        |                 |
| Present           | 0.77 (0.42–1.42)     | 0.41            |                        |                 |



|                               |                  |      |
|-------------------------------|------------------|------|
| AST (per 1 IU/L)              | 1.01 (0.99–1.03) | 0.28 |
| ALT (per 1 IU/L)              | 1.01 (0.99–1.02) | 0.25 |
| Total bilirubin (per 1 mg/dL) | 0.89 (0.52–1.53) | 0.67 |
| Albumin (per 1 g/dL)          | 0.85 (0.34–2.08) | 0.72 |
| Creatinine (per 1 mg/dL)      | 1.02 (0.23–4.55) | 0.98 |
| rtA181 and rtN236 mutation    |                  |      |
| Absent                        | 1 [Reference]    |      |
| Present                       | 0.70 (0.23–2.54) | 0.58 |

---

Time-varying cox was applied for analysis. \*Univariable and multivariable factors were analyzed with Firth method. Abbreviation: aHR, adjusted hazard ratio; AST, aspartate aminotransferase; ALT, alanine aminotransferase; CI, confidence interval; HR, hazard ratio, LC, liver cirrhosis.

**Supplementary Table S3. Univariable and multivariable Cox proportional hazard analysis for chronic kidney disease progression**

| Parameter                        | Univariable analysis |                 | Multivariable analysis |                 |
|----------------------------------|----------------------|-----------------|------------------------|-----------------|
|                                  | HR (95% CI)          | <i>P</i> -value | aHR (95% CI)           | <i>P</i> -value |
| Treatment                        |                      |                 |                        |                 |
| Combination group                | 1 [Reference]        |                 | 1 [Reference]          |                 |
| Single group                     | 1.95 (0.40–9.52)     | 0.41            | 1.65 (0.35–4.62)       | 0.99            |
| Age (per 1 year)                 | 1.05 (0.99–1.11)     | 0.05            | 1.04 (0.98–1.09)       | 0.17            |
| Male                             | 0.65 (0.24–1.80)     | 0.41            |                        |                 |
| Underlying LC                    |                      |                 |                        |                 |
| Absent                           | 1 [Reference]        |                 | 1 [Reference]          |                 |
| Present                          | 2.53 (0.88–7.29)     | 0.08            | 2.02 (0.67–6.05)       | 0.21            |
| Total bilirubin<br>(per 1 mg/dL) | 0.92 (0.42–1.99)     | 0.82            |                        |                 |
| Albumin (per 1 g/dL)             | 0.41 (0.18–0.91)     | 0.03            |                        |                 |
| Creatinine                       | 4.21 (0.53–33.40)    | 0.17            | 11.19 (1.34–93.14)     | 0.03            |

(per 1 mg/dL)

|             |                  |      |                  |      |
|-------------|------------------|------|------------------|------|
| Phosphorous | 2.29 (0.91–5.74) | 0.08 | 3.12 (1.24–7.81) | 0.02 |
|-------------|------------------|------|------------------|------|

---

Time-varying cox was applied for analysis. \*Univariable and multivariable factors were analyzed with Firth method. Abbreviation: aHR, adjusted hazard ratio; CI, confidence interval; HR, hazard ratio, LC, liver cirrhosis.

**Supplementary Table S4. Univariable and multivariable Cox proportional hazard analysis for hypophosphatemia**

| Parameter                        | Univariable analysis |                 | Multivariable analysis |                 |
|----------------------------------|----------------------|-----------------|------------------------|-----------------|
|                                  | HR (95% CI)          | <i>P</i> -value | aHR (95% CI)           | <i>P</i> -value |
| Treatment                        |                      |                 |                        |                 |
| Combination group                | 1 [Reference]        |                 | 1 [Reference]          |                 |
| Single group                     | 2.01 (0.53–7.64)     | 0.31            | 2.57 (0.58–11.39)      | 0.21            |
| Age (per 1 year)                 | 1.04 (0.99–1.09)     | 0.13            |                        |                 |
| Male                             | 1.20 (0.43–3.34)     | 0.72            |                        |                 |
| Underlying LC                    |                      |                 |                        |                 |
| Absent                           | 1 [Reference]        |                 | 1 [Reference]          |                 |
| Present                          | 5.48 (1.59–18.90)    | 0.007           | 5.37 (1.54–18.73)      | 0.008           |
| Total bilirubin<br>(per 1 mg/dL) | 1.32 (0.95–1.85)     | 0.10            |                        |                 |
| Albumin (per 1 g/dL)             | 0.30 (0.17–0.54)     | <0.001          |                        |                 |
| Creatinine                       | 7.19 (0.95–54.08)    | 0.06            | 3.24 (0.51–20.65)      | 0.21            |

(per 1 mg/dL)

|             |                  |        |                  |       |
|-------------|------------------|--------|------------------|-------|
| Phosphorous | 0.18 (0.07–0.48) | <0.001 | 0.23 (0.08–0.62) | 0.004 |
|-------------|------------------|--------|------------------|-------|

---

Time-varying cox was applied for analysis. \*Univariable and multivariable factors were analyzed with Firth method. Abbreviation: aHR, adjusted hazard ratio; CI, confidence interval; HR, hazard ratio, LC, liver cirrhosis.
